# Supplementary material for: Designing multifunctional organic thermochromic ferroelectric materials: remarkable melt-cool large thermal hysteresis of reversible single crystal to single crystal transformation
Source: Royal Society of Chemistry journal article supplement (doi:10.1039/d3ma01073b), 2024-01-01
Supplement: d3ma01073b1.pdf [file d3ma01073b1.pdf]

## Supplementary Information

### Designing Multifunctional Organic Thermochromic Ferroelectric Materials: Remarkable Melt-Cool Large Thermal Hysteresis of Reversible Single Crystal to Single Crystal Transformation

Rekha Kumari,<sup>a</sup> Arnab De,<sup>b</sup> Aninda Jiban Bhattacharyya<sup>c</sup> and T. N. Guru Row <sup>\*d</sup>

<sup>a & c</sup> Interdisciplinary Centre for Energy Research & Solid State and Structural Chemistry  
Unit, Indian Institute of Science, Bengaluru - 560012.

<sup>b</sup> Materials Engineering, Indian Institute of Science, Bengaluru - 560012.

<sup>d</sup> Solid State and Structural Chemistry Unit, Indian Institute of Science, Bengaluru -  
560012.

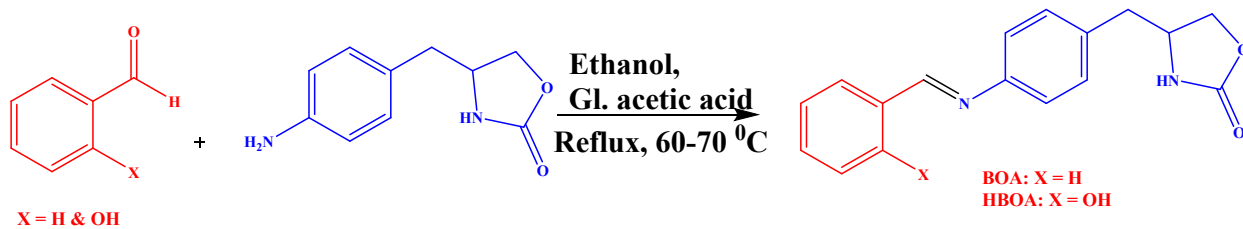

S1: Scheme Synthetic route for BOA and HBOA

## Fourier Transform Infrared Analysis

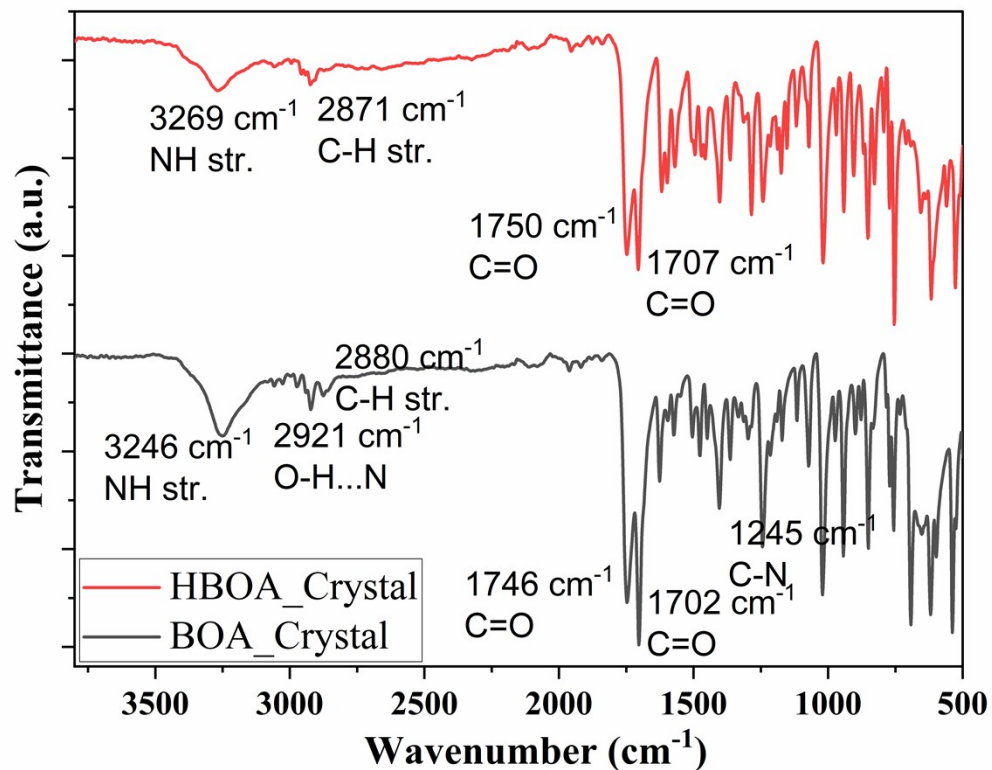

**Figure S2.** The FTIR spectrum of BOA and HBOA show the stretching bands of  $\text{-C=O-}$  appeared at  $1746 \text{ cm}^{-1}$  and  $1750 \text{ cm}^{-1}$  respectively. The NH stretching band observed at  $3246 \text{ cm}^{-1}$  and  $3269 \text{ cm}^{-1}$  for BOA and HBOA respectively. The hydroxyl band (intramolecular hydrogen bond) was observed at  $2921 \text{ cm}^{-1}$ .

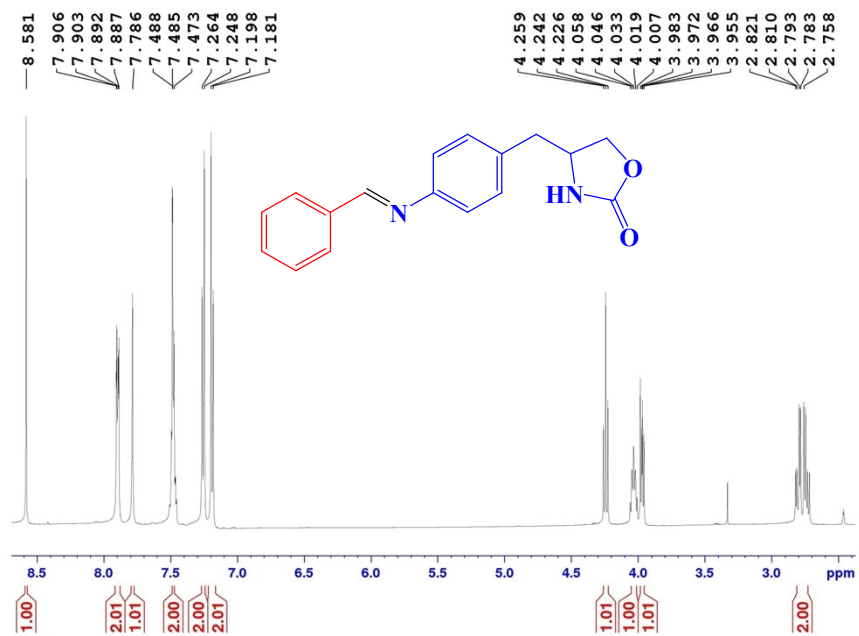

Figure S3. <sup>1</sup>H NMR spectrum of BOA in CDCl<sub>3</sub>.

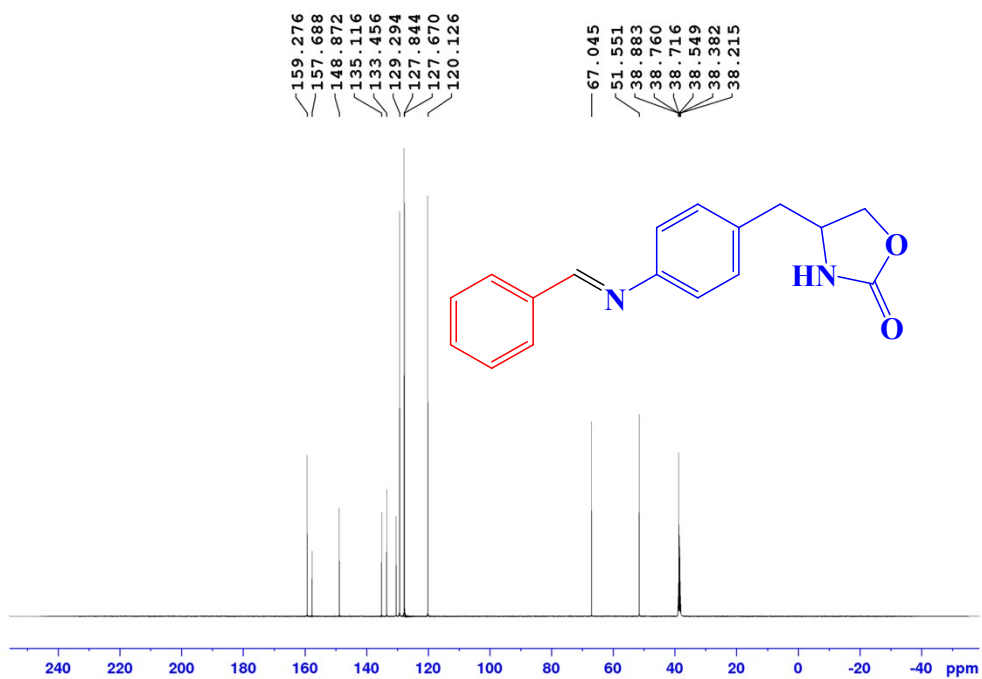

Figure S4. <sup>13</sup>C NMR spectrum of BOA in CDCl<sub>3</sub>.

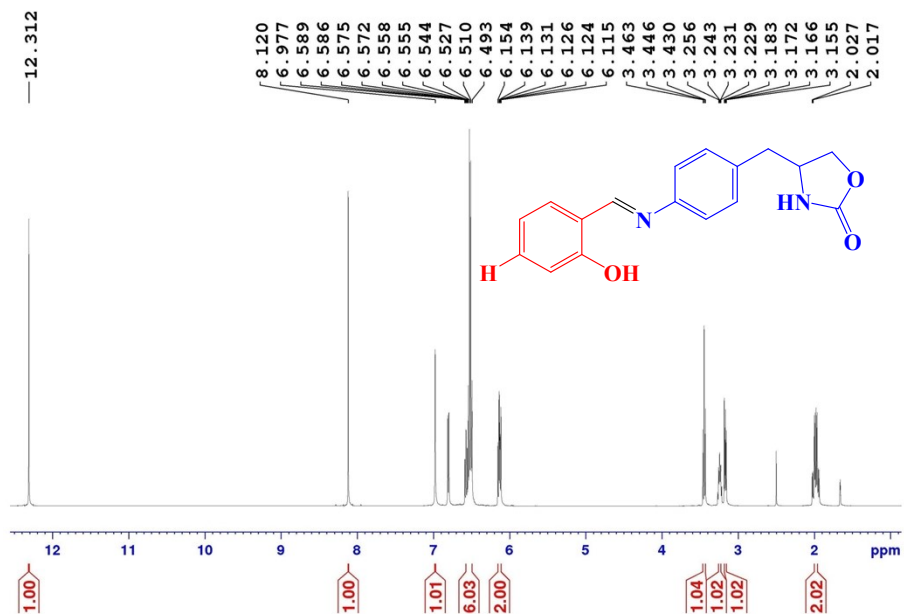

Figure S5. <sup>1</sup>H NMR spectrum of HBOA in CDCl<sub>3</sub>.

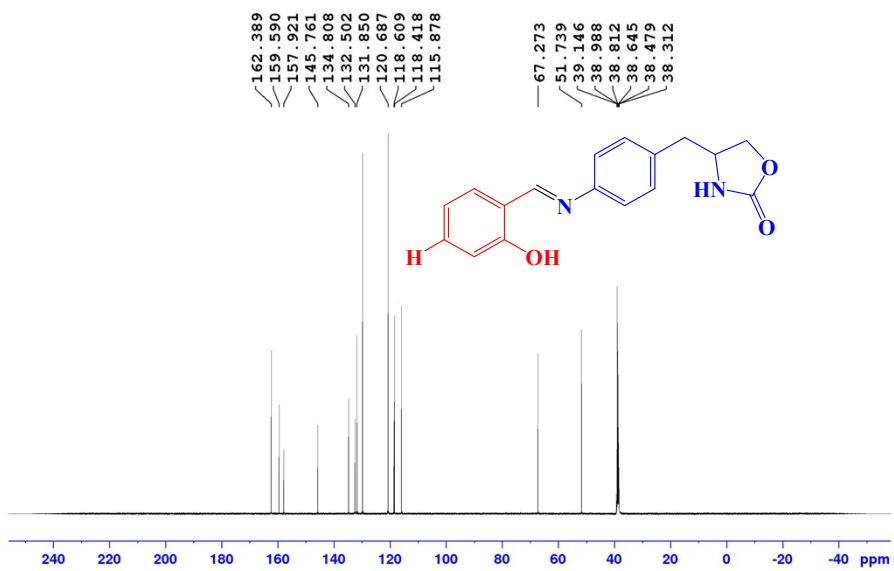

Figure S6. <sup>13</sup>C NMR spectrum of HBOA in CDCl<sub>3</sub>.

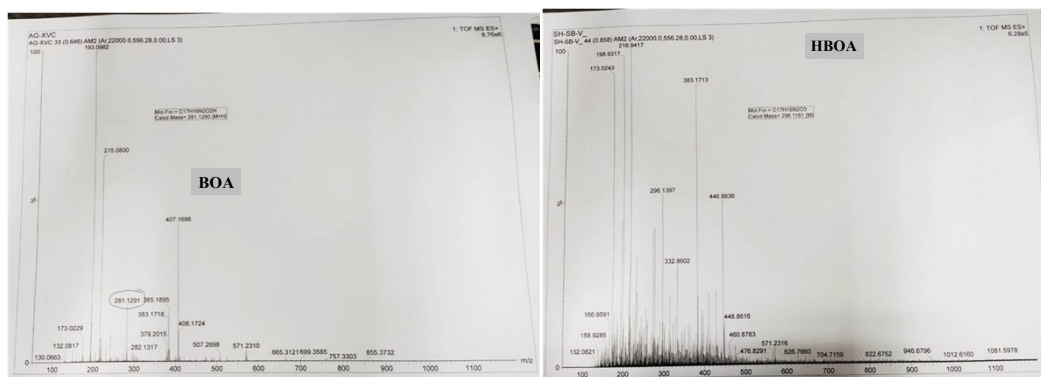

Figure S7. Mass spectrum of BOA and HBOA.

Table S1. Variable temperature crystal data and structure refinement of BOA.

| Compound                                  | BOA_100K                                                   | BOA_293K                                                   | BOA_368K                                                   |
|-------------------------------------------|------------------------------------------------------------|------------------------------------------------------------|------------------------------------------------------------|
| CCDC no.                                  | 1983772                                                    | 1983771                                                    | 2026778                                                    |
| Chemical formula                          | $C_{17}H_{16}N_2O_2$                                       | $C_{17}H_{16}N_2O_2$                                       | $C_{17}H_{16}N_2O_2$                                       |
| Formula weight                            | 280.3                                                      | 280.3                                                      | 280.3                                                      |
| Crystal system                            | Monoclinic                                                 | Monoclinic                                                 | Monoclinic                                                 |
| Space group                               | $P2_1$                                                     | $P2_1$                                                     | $P2_1$                                                     |
| $a$ (Å)                                   | 5.9009(1)                                                  | 5.9424(3)                                                  | 5.930(2)                                                   |
| $b$ (Å)                                   | 8.4145(2)                                                  | 8.5540(4)                                                  | 8.588(2)                                                   |
| $c$ (Å)                                   | 14.2428(3)                                                 | 14.3274(7)                                                 | 14.312(3)                                                  |
| $\alpha$ (°)                              | 90.000                                                     | 90.000                                                     | 90.00(3)                                                   |
| $\beta$ (°)                               | 98.443(2)                                                  | 98.358(4)                                                  | 98.21(3)                                                   |
| $\gamma$ (°)                              | 90.000                                                     | 90.000                                                     | 90.00(3)                                                   |
| $V$ (Å <sup>3</sup> )                     | 699.54(2)                                                  | 720.55(4)                                                  | 721.5(3)                                                   |
| $Z$                                       | 2                                                          | 2                                                          | 2                                                          |
| $T$ (K)                                   | 100.00(2)                                                  | 293(2)                                                     | 368(2)K                                                    |
| $D_{calc}$ (g cm <sup>-3</sup> )          | 1.33                                                       | 1.29                                                       | 0.64                                                       |
| Abs. coefficient (mm <sup>-1</sup> )      | 0.089                                                      | 0.086                                                      | 0.043                                                      |
| $F(000)$                                  | 296.0                                                      | 296.0                                                      | 147.0                                                      |
| $\vartheta$ Range for data collection (°) | 3.5-27.5                                                   | 3.5-27.5                                                   | 1.4-30.6                                                   |
| Limiting indices                          | $-7 \leq h \leq 7, -10 \leq k \leq 10, -18 \leq l \leq 18$ | $-7 \leq h \leq 7, -11 \leq k \leq 11, -18 \leq l \leq 18$ | $-8 \leq h \leq 4, -11 \leq k \leq 12, -20 \leq l \leq 20$ |
| Reflections collected                     | 10790                                                      | 10688                                                      | 16945                                                      |
| Unique reflections ( $R_{int}$ )          | 3211 (0.033)                                               | 3302 (0.030)                                               | 4391 (0.043)                                               |
| Completeness of $\vartheta$               | 27.42 (99.77%)                                             | 27.42 (99.77%)                                             | 27.42 (99.77%)                                             |
| Data/restraints/parameters                | 3211/1/202                                                 | 10688/1/202                                                | 4391/1/204                                                 |
| GOF                                       | 1.040                                                      | 1.046                                                      | 0.926                                                      |
| Final R indices [ $I > 2\sigma(I)$ ]      | $R_1 = 0.037, wR_2 = 0.083$                                | $R_1 = 0.050, wR_2 = 0.117$                                | $R_1 = 0.049, wR_2 = 0.105$                                |

|                                             |                                |                                |                                |
|---------------------------------------------|--------------------------------|--------------------------------|--------------------------------|
| R indices (all data)                        | $R_1 = 0.040$ , $wR_2 = 0.086$ | $R_1 = 0.063$ , $wR_2 = 0.128$ | $R_1 = 0.152$ , $wR_2 = 0.142$ |
| $\Delta\rho_{\max}$ (e. $\text{\AA}^{-3}$ ) | 0.199                          | 0.349                          | 0.158                          |
| $\Delta\rho_{\min}$ (e. $\text{\AA}^{-3}$ ) | -0.207                         | -0.162                         | -0.133                         |
| Flack Parameters                            | 1.2(6)                         | 1.1(7)                         | 0.2(8)                         |

**Table S2.** Variable temperature crystal data and structure refinement of **HBOA**.

| Compound                                           | HBOA_100K                                                        | HBOA_293K                                                        | HBOA_390K                                                        |
|----------------------------------------------------|------------------------------------------------------------------|------------------------------------------------------------------|------------------------------------------------------------------|
| CCDC no.                                           | 1972047                                                          | 1972046                                                          | 2305762                                                          |
| Chemical formula                                   | $\text{C}_{17}\text{H}_{16}\text{N}_2\text{O}_3$                 | $\text{C}_{17}\text{H}_{16}\text{N}_2\text{O}_3$                 | $\text{C}_{17}\text{H}_{16}\text{N}_2\text{O}_3$                 |
| Formula weight                                     | 296.3                                                            | 296.3                                                            | 296.3                                                            |
| Crystal system                                     | Monoclinic                                                       | Monoclinic                                                       | Monoclinic                                                       |
| Space group                                        | $P2_1$                                                           | $P2_1$                                                           | $P2_1$                                                           |
| $a$ ( $\text{\AA}$ )                               | 5.7166(1)                                                        | 5.7695(2)                                                        | 5.7876(7)                                                        |
| $b$ ( $\text{\AA}$ )                               | 8.7186(2)                                                        | 8.7640(3)                                                        | 8.8409(12)                                                       |
| $c$ ( $\text{\AA}$ )                               | 14.3362(3)                                                       | 14.5821(15)                                                      | 14.6760(2)                                                       |
| $\alpha$ ( $^\circ$ )                              | 90.000                                                           | 90.000                                                           | 90.000                                                           |
| $\beta$ ( $^\circ$ )                               | 97.672(2)                                                        | 98.449(3)                                                        | 98.218(3)                                                        |
| $\gamma$ ( $^\circ$ )                              | 90.000                                                           | 90.000                                                           | 90.000                                                           |
| $V$ ( $\text{\AA}^3$ )                             | 708.13(2)                                                        | 729.33(3)                                                        | 738.22(4)                                                        |
| $Z$                                                | 2                                                                | 2                                                                | 2                                                                |
| $T$ (K)                                            | 99.99(10)                                                        | 293(2)                                                           | 390(2)                                                           |
| $D_{\text{calc}}$ ( $\text{g cm}^{-3}$ )           | 1.39                                                             | 1.35                                                             | 1.32                                                             |
| Abs. coefficient ( $\text{mm}^{-1}$ )              | 0.097                                                            | 0.094                                                            | 0.092                                                            |
| $F(000)$                                           | 312.0                                                            | 312.0                                                            | 312.0                                                            |
| $\vartheta$ Range for data collection ( $^\circ$ ) | 3.6-27.5                                                         | 2.6-27.5                                                         | 1.4-30.8                                                         |
| Limiting indices                                   | $-7 \leq h \leq 7$ , $-11 \leq k \leq 11$ , $-18 \leq l \leq 18$ | $-7 \leq h \leq 7$ , $-11 \leq k \leq 11$ , $-18 \leq l \leq 18$ | $-8 \leq h \leq 8$ , $-12 \leq k \leq 12$ , $-20 \leq l \leq 20$ |
| Reflections collected                              | 10961                                                            | 11140                                                            | 9732                                                             |
| Unique reflections ( $R_{\text{int}}$ )            | 3129 (0.029)                                                     | 3340 (0.027)                                                     | 4383 (0.053)                                                     |
| Completeness of $\vartheta$                        | 27.42 (99.77%)                                                   | 27.42 (99.72%)                                                   | 27.42 (99.77%)                                                   |
| Data/restraints/parameters                         | 3129/1/207                                                       | 3340/1/215                                                       | 4383/1/212                                                       |
| GOF                                                | 1.037                                                            | 1.056                                                            | 0.887                                                            |
| Final R indices [ $I > 2\sigma(I)$ ]               | $R_1 = 0.032$ , $wR_2 = 0.074$                                   | $R_1 = 0.041$ , $wR_2 = 0.088$                                   | $R_1 = 0.045$ , $wR_2 = 0.078$                                   |
| R indices (all data)                               | $R_1 = 0.033$ , $wR_2 = 0.075$                                   | $R_1 = 0.051$ , $wR_2 = 0.098$                                   | $R_1 = 0.174$ , $wR_2 = 0.114$                                   |
| $\Delta\rho_{\max}$ (e. $\text{\AA}^{-3}$ )        | 0.185                                                            | 0.100                                                            | 0.108                                                            |
| $\Delta\rho_{\min}$ (e. $\text{\AA}^{-3}$ )        | -0.172                                                           | -0.127                                                           | -0.100                                                           |
| Flack Parameters                                   | 1.1(4)                                                           | -1.1(6)                                                          | -3.9(10)                                                         |

**Table S3.** Optical activity parameters of BOA

RK-XVI-1

|                           |                  |             |                |
|---------------------------|------------------|-------------|----------------|
| [Data Information]        |                  | [Comment]   |                |
| Creation Date             | 02-07-2021 11:25 | Sample name | RK-XVI         |
|                           |                  | Comment     | CHCl3, C = 1.0 |
| [Measurement Information] |                  | User        | SS             |
| Instrument Name           | JASCO            | Division    | OC             |
| Model Name                | P-2000           | Company     | IISc           |
| Serial No.                | A109661232       |             |                |
| Polarizer                 | Dichrom          |             |                |
| Faraday Cell              | Flint Glass      |             |                |
| Accessory                 | PTC-262          |             |                |
| Accessory S/N             | A021561481       |             |                |
| Path Length               | 100 mm           |             |                |
| Light Source              | Na               |             |                |
| Monitor wavelength        | 589 nm           |             |                |
| D.I.T.                    | 5 sec            |             |                |
| No. of cycle              | 5                |             |                |
| Cycle interval            | 5 sec            |             |                |
| Temp. Monitor             | Holder           |             |                |
| Temp. Corr. Factor        | 0 at 20 C        |             |                |
| Aperture(S)               | 3.0mm            |             |                |
| Aperture(L)               | Auto             |             |                |
| Mode                      | Specific O.R.    |             |                |
| Path Length               | 50 mm            |             |                |
| Concentration             | 1 w/v%           |             |                |
| Water content of sample   | 0 %              |             |                |
| Factor                    | 1                |             |                |

|   | No. | PMT Voltage[V] | Mode          | Sample No. | Calc. Data | Meas. Data | Temperature(C) | Blank   |
|---|-----|----------------|---------------|------------|------------|------------|----------------|---------|
| 1 | * 1 | 404            | Specific O.R. | RK-XVI-1   | -1.5400    | -0.0077    | 22.00          | -0.6197 |
| 2 | * 2 | 402            | Specific O.R. | RK-XVI-2   | -2.0000    | -0.0100    | 21.96          | -0.6197 |
| 3 | * 3 | 402            | Specific O.R. | RK-XVI-3   | -1.7400    | -0.0087    | 21.92          | -0.6197 |
| 4 | * 4 | 404            | Specific O.R. | RK-XVI-4   | -1.6800    | -0.0084    | 21.90          | -0.6197 |
| 5 | * 5 | 405            | Specific O.R. | RK-XVI-5   | -1.2800    | -0.0064    | 21.87          | -0.6197 |
| 6 | * 6 |                |               | Avg.       | -1.6480    |            |                |         |
| 7 | 7   |                |               | S.D        | 0.2648     |            |                |         |
| 8 | 8   |                |               | C.V        | 16.0681    |            |                |         |

|   | Measurement Date |
|---|------------------|
| 1 | 02-07-2021 11:24 |
| 2 | 02-07-2021 11:24 |
| 3 | 02-07-2021 11:25 |
| 4 | 02-07-2021 11:25 |
| 5 | 02-07-2021 11:25 |
| 6 |                  |
| 7 |                  |
| 8 |                  |

Table S4. Optical activity parameters of HBOA

RK-V-1

[Data Information]  
 Creation Date 02-07-2021 11:12

[Comment]  
 Sample name RK-V  
 Comment CHCl<sub>3</sub>, C = 1.0  
 User SS  
 Division OC  
 Company IISc

[Measurement Information]  
 Instrument Name JASCO  
 Model Name P-2000  
 Serial No. A109881232  
 Polarizer Dichrom  
 Faraday Cell Flint Glass

Accessory PTC-262  
 Accessory S/N A021581481  
 Path Length 100 mm

Light Source Na  
 Monitor wavelength 589 nm  
 D.I.T. 5 sec  
 No. of cycle 5  
 Cycle interval 5 sec  
 Temp. Monitor Holder  
 Temp. Corr. Factor 0 at 20 C  
 Aperture(S) 3.0mm  
 Aperture(L) Auto  
 Mode Specific O.R.  
 Path Length 50 mm  
 Concentration 1 w/v%  
 Water content of sample 0 %  
 Factor 1

|   | No. | PMT Voltage[V] | Mode | Sample No.    | Calc. Data | Meas. Data | Temperature(C) | Blank |         |
|---|-----|----------------|------|---------------|------------|------------|----------------|-------|---------|
| 1 | *   | 1              | 400  | Specific O.R. | RK-V-1     | -9.0000    | -0.0450        | 21.77 | -0.6197 |
| 2 | *   | 2              | 401  | Specific O.R. | RK-V-2     | -9.4000    | -0.0470        | 21.71 | -0.6197 |
| 3 | *   | 3              | 398  | Specific O.R. | RK-V-3     | -8.8200    | -0.0441        | 21.67 | -0.6197 |
| 4 | *   | 4              | 398  | Specific O.R. | RK-V-4     | -9.3800    | -0.0469        | 21.67 | -0.6197 |
| 5 | *   | 5              | 399  | Specific O.R. | RK-V-5     | -9.1600    | -0.0458        | 21.70 | -0.6197 |
| 6 | *   | 6              |      | Avg.          |            | -9.1520    |                |       |         |
| 7 |     | 7              |      | S.D           |            | 0.2484     |                |       |         |
| 8 |     | 8              |      | C.V           |            | 2.7145     |                |       |         |

|   | Measurement Date |
|---|------------------|
| 1 | 02-07-2021 11:12 |
| 2 | 02-07-2021 11:12 |
| 3 | 02-07-2021 11:12 |
| 4 | 02-07-2021 11:12 |
| 5 | 02-07-2021 11:12 |
| 6 |                  |
| 7 |                  |
| 8 |                  |



**S8 PFM imaging method:** PFM imaging has been done in a thin film where BOA and HBOA were loaded on a ITO glass substrate. During the testing, the tip scans the sample surface line-by-line while the AC voltage is applied. PFM imaging was performed with a Digital Instruments Dimension PARK NX20 atomic force microscope with platinum-coated tips. PFM images were collected near the cantilever's incontact resonance frequency (0.7 Hz) to enhance the vertical resolution. The imaging signal of 10V peak voltage at (0.7 Hz) was provided by an external function generator. The out-of-plane (vertical PFM) signals were collected. Phase Imaging: Maps the spatial distribution of domains based on phase differences. Bright and dark areas represent opposite polarization directions, respectively. Amplitude Imaging: Reveals domain boundaries as lines or regions of minimal cantilever deflection. The demodulated signal is used to generate a two-dimensional map of the local piezoelectric response, revealing the spatial distribution of piezoelectric response for surface morphology. The result of thin films is very similar like from the observation on bulk single-crystal samples. The contrast patterns reveal the arrangement of surface morphology like staircase within the HBOA material.
